# Supplementary material
Source: publisher figshare collection journal article supplement (https://gsajournals.figshare.com/ndownloader/files/14887640)

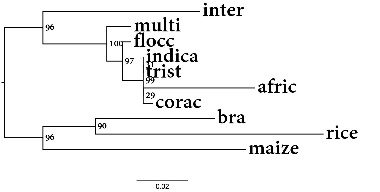

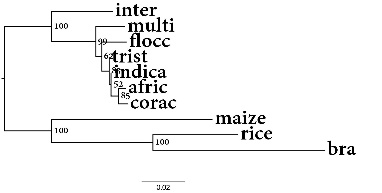

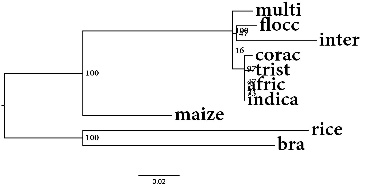

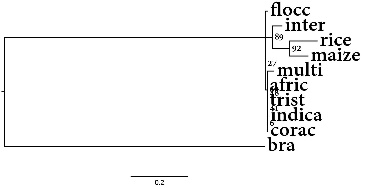


(A)


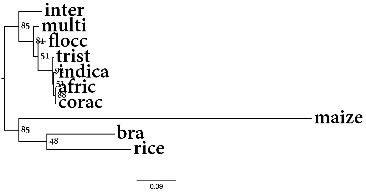


(B)


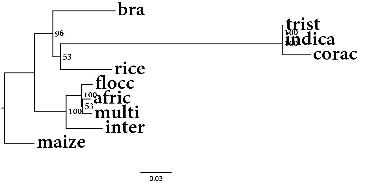

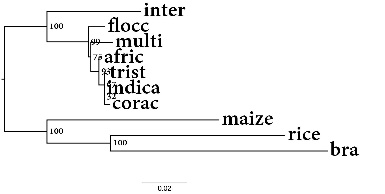

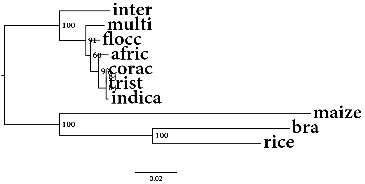

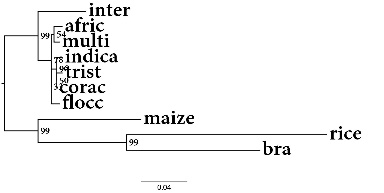


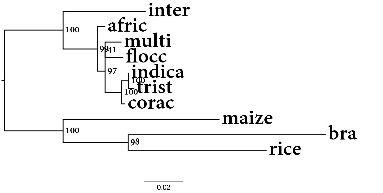

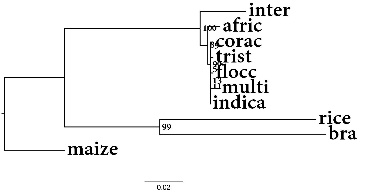

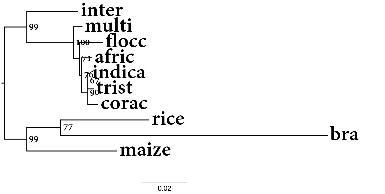

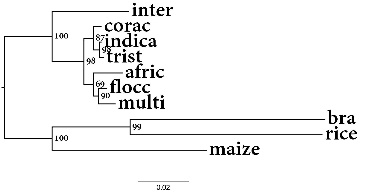


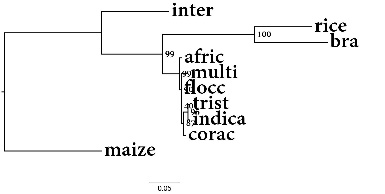

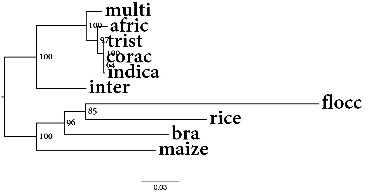


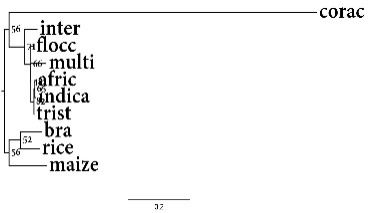


(C)


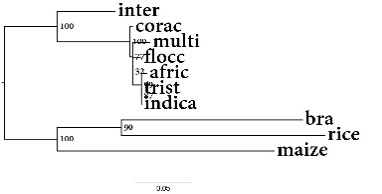

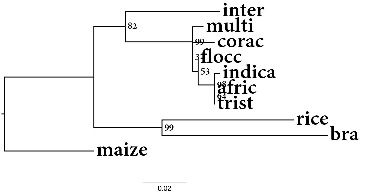

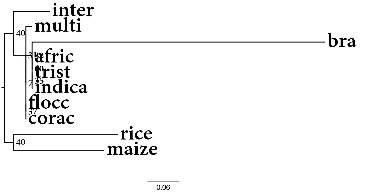


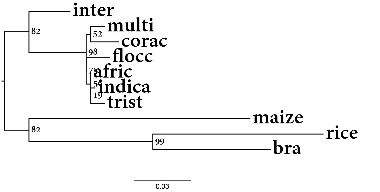

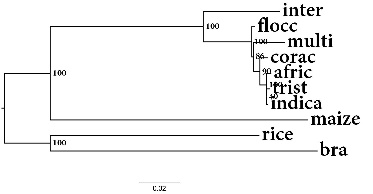

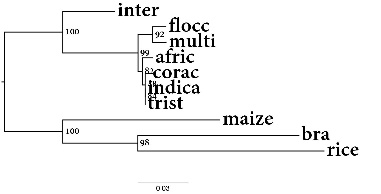


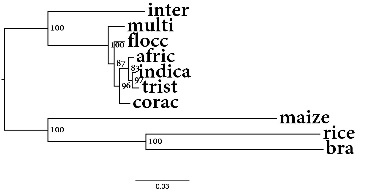


(D)


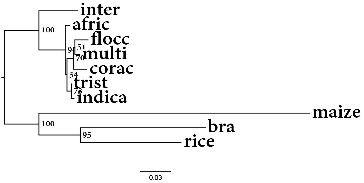

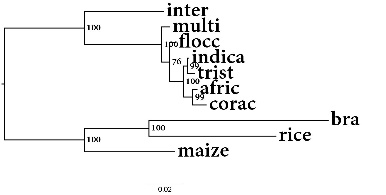

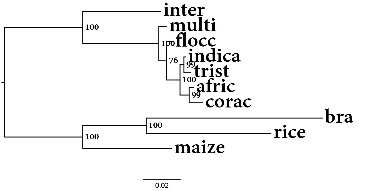

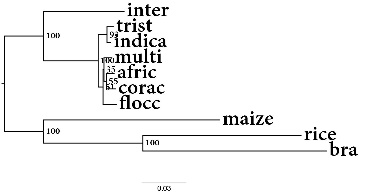


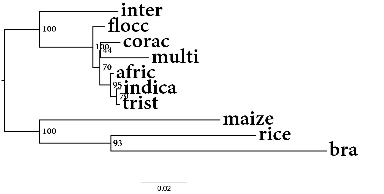


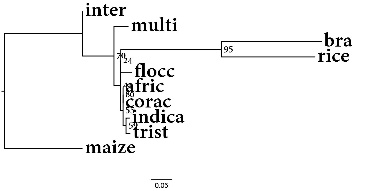

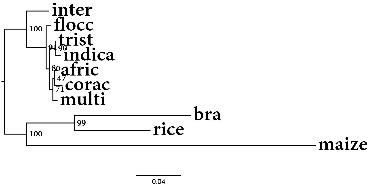


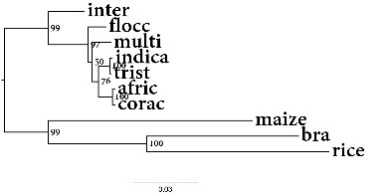

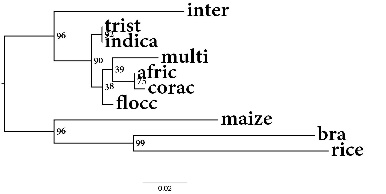

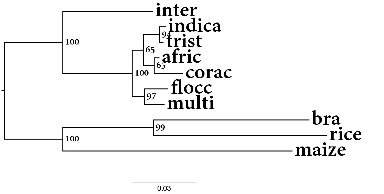

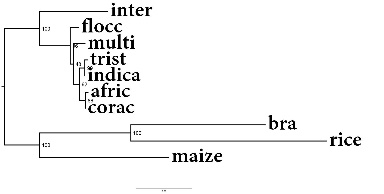


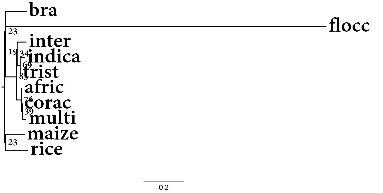

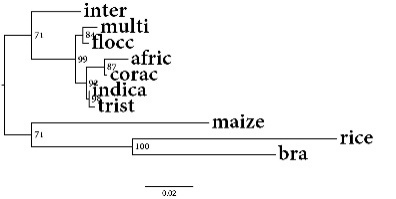


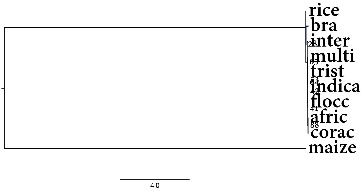

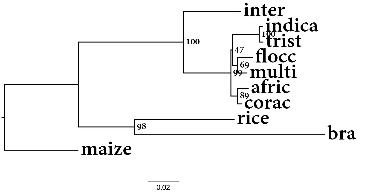


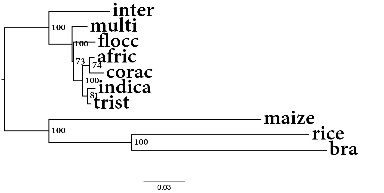


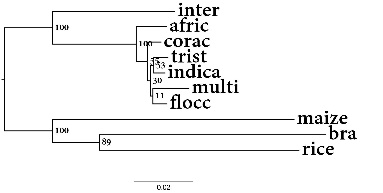

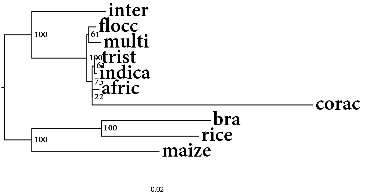

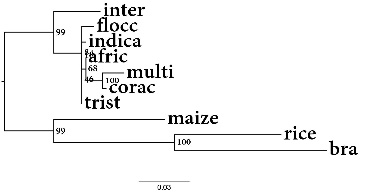


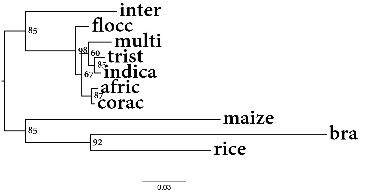

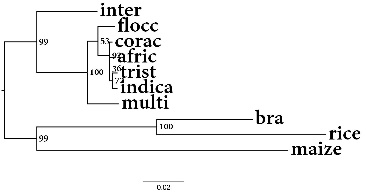


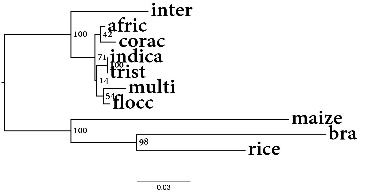

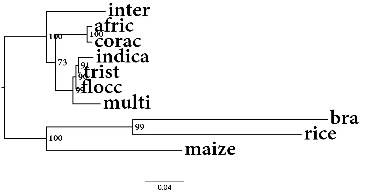


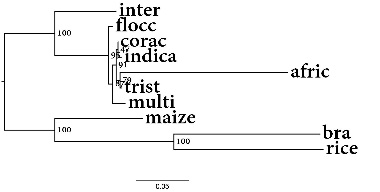

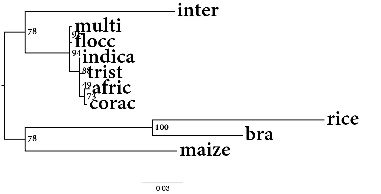

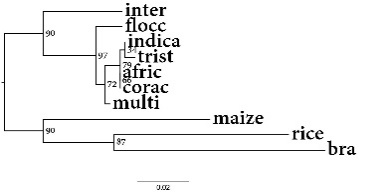


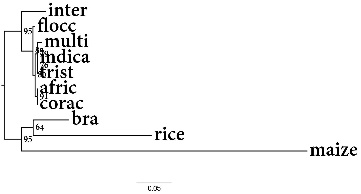


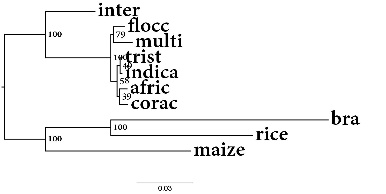

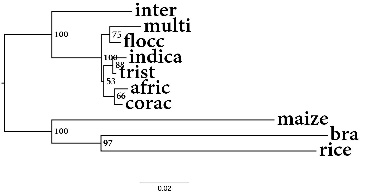

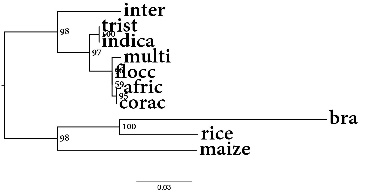


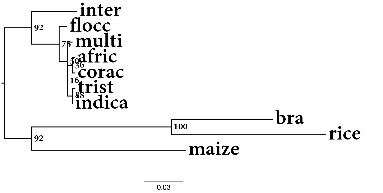


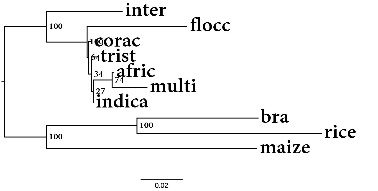

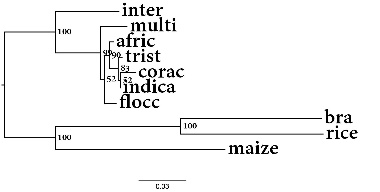

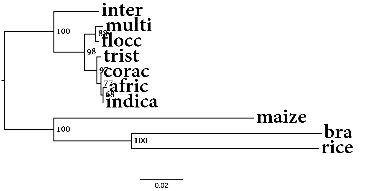

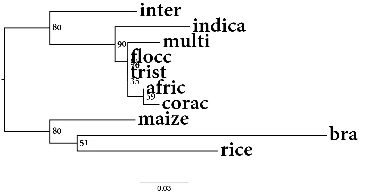


(E)


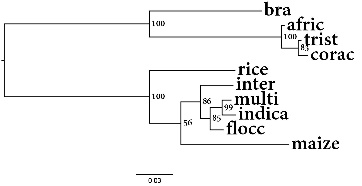

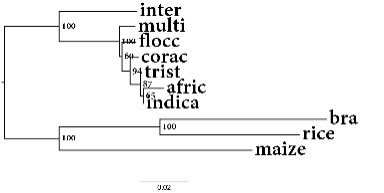

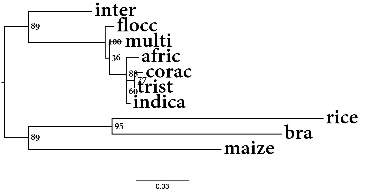

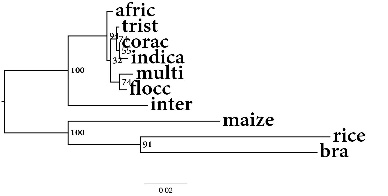


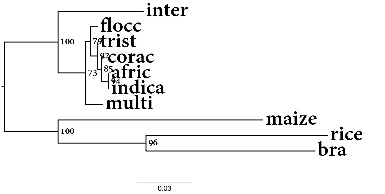

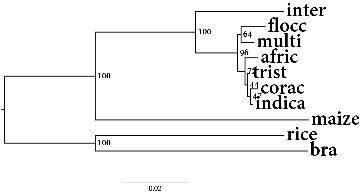

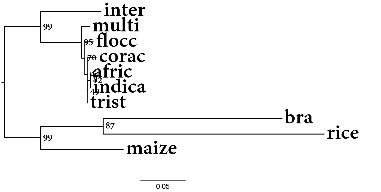

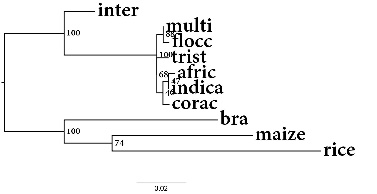


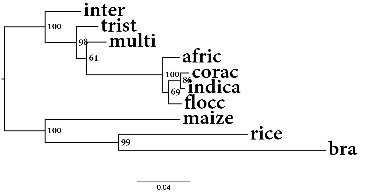

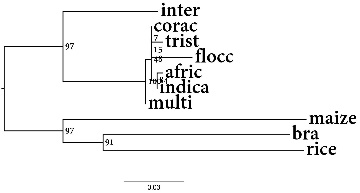

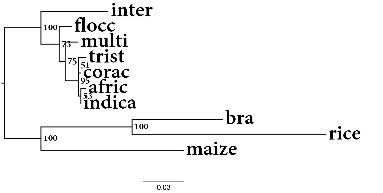

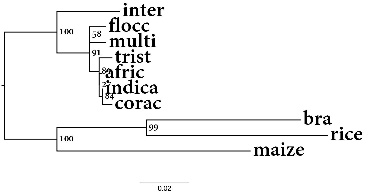

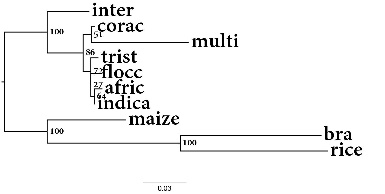

Supplement: Supplementary file 1 [file 14887640]
